# Supplementary material for: Comparative Transcriptome Analysis Reveals the Effect of miR156a Overexpression on Mineral Nutrient Homeostasis in Nicotiana tabacum
Source: MDPI journal article supplement (doi:10.3390/plants12091739), 2023-04-23
Supplement: s1 [file s1]

Table S1. Primer list

| Primer name               | Primer sequences (5'-3')                           | Description                                         |
|---------------------------|----------------------------------------------------|-----------------------------------------------------|
| RT-U6                     | GTGCAGGGTCCGAGGTTTTGGACCATTCTCGAT                  | RT-U6 stem loop primer                              |
| qF-U6                     | GGAACGATACAGAGAAGATTAGCA                           | qF-U6 qPCR forward primer                           |
| qF-miR156                 | GGACCTGACAGAAGAGAGT                                | qF-miR156 qPCR forward primer                       |
| qR-miRNA                  | GTGCAGGGTCCGAGGT                                   | qR-miRNA qPCR reverse primer                        |
| RT-miR156                 | GTCGTATCCAGTGCAGGGTCCGAGGTATTCGCACTGGATACGACGTGCTC | RT-miR156 stem loop primer                          |
| F-MIR156a                 | CAGTGAGCACGCATAGGTTC                               | Primers for detection of MIR156a insertion fragment |
| sR-pCXS <sup>N</sup> -M13 | GTTGTAAAACGACGGCCAGT                               | Primers for pCXS <sup>N</sup> vector detection      |
| F-Hyg <sup>R</sup>        | ATCGGACGATTGCGTCGCATC                              | Hyg <sup>R</sup> gene amplification forward primers |
| R-Hyg <sup>R</sup>        | GTGTCACGTTGCAAGACCTG                               | Hyg <sup>R</sup> gene amplification reverse primers |
| qF-NtSPL4a                | AGCCATAATAGGGACAGACACT                             | LOC107789550 expression verification                |
| qR-NtSPL4a                | GAGAGCAAGCATATCGTATCCA                             |                                                     |
| qF-NtSPL4c                | AACTTCCACCTCCGTTGAAGAA                             | LOC107785538 expression verification                |
| qR-NtSPL4c                | CCAGTAGTACTAATGGCCGTGT                             |                                                     |
| qF-NtRuBisCO              | CGTCCTCTTTCCCAGTTTCCAG                             | LOC107785215 expression verification                |
| qR-NtRuBisCO              | ATTGCTCCTCGCTCAAATCAGG                             |                                                     |
| qF-NtGRX                  | ACTGGCTTTGAGAAGCTTAGGT                             | LOC107801186 expression verification                |
| qR-NtGRX                  | AGAGAGCCATCAACATGAAGGG                             |                                                     |
| qF-NtPCAP1                | ACATGGTGGTTGAAGCTGGAGA                             | LOC107776048 expression verification                |

---

|            |                        |                                      |
|------------|------------------------|--------------------------------------|
| qR-NtPCAP1 | GCTGTCTCTGTTGCTGGCTCTG |                                      |
| qF-NtFSD1  | CACACCGCTCCTCACCATAGAC | LOC107767307 expression verification |
| qR-NtFSD1  | AGCCTAGAACTGACTGCTTCC  |                                      |
| qF-NtPOD   | AGATCCAGTCTTCCGCCCTCT  | LOC107809385 expression verification |
| qR-NtPOD   | TGAACAGCTTTCTCACCACACC |                                      |
| qF-NtHSP   | GCGGCAAATTCCTTAGGCGATT | LOC107790339 expression verification |
| qR-NtHSP   | TGGCTTTGACCTCAGGCTTCTT |                                      |

---
